# Supplementary material
Source: PubMed Central journal article supplement (PMC8343546)
Supplement: bloodBLD2020008958-suppl1.pdf [file bloodBLD2020008958-suppl1.pdf]

# Platelet MHC Class I Mediates CD8<sup>+</sup> T Cell Suppression During Sepsis

Li Guo<sup>1</sup>, Sikui Shen<sup>1,2</sup>, Jesse W. Rowley<sup>1,3</sup>, Neal D. Tolley<sup>1</sup>, Wenwen Jia<sup>1,4</sup>, Bhanu Kanth Manne<sup>1</sup>, Kyra N. McComas<sup>5</sup>, Ben Bolingbroke<sup>6</sup>, Yasuhiro Kosaka<sup>1</sup>, Krystin Krauel<sup>1,7</sup>, Frederik Denorme<sup>1</sup>, Shancy P. Jacob<sup>1,3</sup>, Alicia S. Eustes<sup>1,8</sup>, Robert A. Campbell<sup>1,3</sup>, Elizabeth A. Middleton<sup>1,3</sup>, Xiao He<sup>9</sup>, Samuel M. Brown<sup>10-12</sup>, Craig N. Morrell<sup>13</sup>, Andrew S. Weyrich<sup>1,12,\*</sup>, Matthew T. Rondina<sup>1,3,9,14,\*</sup>

<sup>1</sup>University of Utah Molecular Medicine Program, Salt Lake City, Utah, USA

<sup>2</sup>West China Hospital, Sichuan University, Chengdu, Sichuan, China

<sup>3</sup>Department of Medicine, Division of General Internal Medicine, University of Utah School of Medicine, Salt Lake City

<sup>4</sup>Sichuan Academy of Medical Sciences and Sichuan Provincial People's Hospital, Chengdu

<sup>5</sup>University of Utah School of Medicine, Salt Lake City

<sup>6</sup>University of Utah Biomedical Engineering, Salt Lake City

<sup>7</sup>Department of Cardiology and Angiology I, Heart Center, University of Freiburg, Freiburg, Germany

<sup>8</sup>Internal Medicine, University of Iowa, Iowa City, IA USA

<sup>9</sup>Department of Pathology, University of Utah, Salt Lake City, Utah, USA

<sup>10</sup>Center for Humanizing Critical Care, Intermountain Healthcare, Murray, Utah, USA

<sup>11</sup>Department of Medicine, Pulmonary and Critical Care Division, Intermountain Medical Center, Murray, Utah, USA

<sup>12</sup>Department of Medicine, Pulmonary and Critical Care Division, University of Utah School of Medicine, Salt Lake City, Utah, USA

<sup>13</sup>Aab Cardiovascular Research Institute, University of Rochester Medical Center, Rochester, NY, USA

<sup>14</sup>George E. Wahlen VAMC Department of Internal Medicine and GRECC, Salt Lake City, Utah, USA

\*Equal contributions

Running Title: *Platelet MHC-I regulates CD8<sup>+</sup> T cells in sepsis*

## Corresponding Authors:

Andrew S. Weyrich, PhD

Professor of Medicine, University of Utah

University of Utah Health Sciences Center

Eccles Institute of Human Genetics

15 North 2030 East, Room 4220A

Salt Lake City, Utah 84112

Email: [andy.weyrich@utah.edu](mailto:andy.weyrich@utah.edu)

(801) 587-8308 (phone)

(801) 585-0701 (fax)

Matthew T. Rondina, MD

Professor of Medicine, University of Utah

University of Utah Health Sciences Center

Eccles Institute of Human Genetics  
15 North 2030 East, Room 4220A  
Salt Lake City, Utah 84112  
Email: [matthew.rondina@hsc.utah.edu](mailto:matthew.rondina@hsc.utah.edu)  
(801) 587-8308 (phone)  
(801) 585-0701 (fax)

## 1 **Supplemental Methods**

### 2 **Human subjects**

3 Patients admitted to the intensive care unit (ICU) with a primary diagnosis of sepsis were  
4 prospectively enrolled within 48 ( $\pm 24$ ) hours of ICU admission. Sepsis was defined using  
5 SEPSIS-3 consensus criteria.<sup>1</sup> Patients with systemic infection and life-threatening organ  
6 dysfunction were diagnosed with sepsis when total SOFA score was  $\geq 2$ . Septic shock is a subset  
7 of sepsis which can be identified as clinical sepsis with persisting hypotension requiring  
8 vasopressors to maintain MAP  $\geq 65$  mm Hg and having a serum lactate level  $>2$  mmol/L (18  
9 mg/dL). For comparison, healthy donors were also recruited. Healthy donors were defined as  
10 medication-free, male and female adults over the age of 21 without any acute or chronic medical  
11 conditions, illness, or hospitalization within 30 days prior to enrollment. All healthy donors and  
12 patients gave informed consent prior to sample collection (IRB # 51506 and 102638).  
13 Supplemental Table 1 shows demographic information for healthy donors and septic patients.

### 15 **Mice**

16 Wild-type (WT) C57BL/6J male and female mice were obtained from Jackson  
17 laboratory. B6.SJL-Ptprc (B6 Cd45.1) mice were obtained either from Jackson laboratory or  
18 kindly from the laboratory of Dr. Peter Jensen (Department of Pathology, University of Utah).  
19 B2m<sup>fl/fl</sup>-Pf4Cre mice were obtained from Dr. Craig N. Morrell (University of Rochester School  
20 of Medicine, NY).<sup>2</sup> OT-I mice were obtained from Jackson laboratory and crossed with B2m<sup>fl/fl</sup>-  
21 Pf4Cre and littermate control B2m<sup>fl/fl</sup> mice to generate the B2m<sup>fl/fl</sup>-Pf4Cre-OT-I (KO-OT-I and  
22 WT-OT-I) mice. Rag2<sup>-/-</sup> OT-I mice were obtained from Taconic Biosciences. All mice were bred  
23 and maintained in the University of Utah animal facility under pathogen-free conditions

24 according to NIH guidelines. All animal experiments were performed according to protocols  
25 approved by the institutional Animal Care and Use Committee (Protocol No.18-10012). Male  
26 and female mice between 9-16 weeks in age were used in all experiments.

27

## 28 **Platelet Isolation**

29 Platelets were isolated as previously described.<sup>3</sup> Briefly, blood was collected into a one-  
30 sixth volume of acid/citrate/dextrose (ACD) buffer. Platelet-rich plasma was obtained by  
31 centrifugation at  $100 \times g$  for 20 minutes or for 10 min using minicentrifuge at room temperature.  
32 Platelets were isolated from plasma by centrifugation at  $500 \times g$  for 10 minutes and resuspended  
33 in Pipes/Saline/Glucose (PSG) buffer containing 20 nmol/L PGE1, CD45<sup>+</sup> depleted following  
34 Miltenyi Biotec manufacturer's protocol, centrifuged at  $500 \times g$  for 10 minutes again in PSG  
35 buffer containing 20 nmol/L PGE1, and resuspended in Medium 199.

36

## 37 **Megakaryocyte culture and stimulation**

38 CD34<sup>+</sup> derived human megakaryocytes were cultured as previously described.<sup>4</sup> CD34<sup>+</sup>  
39 hematopoietic stem and progenitor cells were isolated from human cord blood and cultured in  
40 serum free expansion media supplemented with 25 ng/mL of stem cell factor and 20 ng/mL of  
41 thrombopoietin (TPO) for six days. Cells were cultured with 50 ng/mL TPO only from days 6-  
42 13. On Day 13, megakaryocytes were harvested, washed, and treated with 50 ng/mL TPO  
43 together with either interferon- $\gamma$  at 250U/mL or lipopolysaccharide (LPS) at 100ng/mL, and  
44 lipopolysaccharide binding protein (LBP) and CD14 were added to the cell culture to facilitate  
45 LPS binding, both at a final concentration of 100ng/mL. After 20h stimulation, HLA-A, B, C  
46 expression on megakaryocytes was measured by flow cytometry.

47

#### 48 **Cecal ligation and puncture (CLP)**

49 CLP was used to induce polymicrobial sepsis in mice. The mice were first anesthetized  
50 with ketamine and xylazine. The lower abdominal area of anesthetized mice was sterilized using  
51 iodine swabs. A small incision was made in the lower abdominal area to expose the cecum. The  
52 cecum was ligated with a 3.0 silk suture and then carefully punctured a single time with a 21G  
53 needle to expose fecal contents into the abdominal cavity. The abdominal cavity was then closed  
54 with non-absorbable nylon sutures and the area re-sterilized with iodine. The mice were then  
55 given a subcutaneous injection of 600 $\mu$ L saline and returned to clean cages on a heating pad  
56 during recovery. Mice received buprenex immediately after the surgery and again a few hours  
57 post-surgery subcutaneously. For sham control conditions, all of the above steps were followed  
58 except the cecum was not ligated and punctured. Mice were monitored daily for disease severity  
59 and euthanized 4 days after CLP unless otherwise stated. Platelets were harvested 4 days after  
60 CLP induction.

61

#### 62 **OVA immunization**

63 To elicit antigen specific CD8<sup>+</sup> T cell responses *in vivo*, chicken ovalbumin (OVA) at  
64 2mg/mL was mixed with equal volume of either complete Freund adjuvant (CFA) or incomplete  
65 Freund adjuvant (IFA) and injected subcutaneously at 50 $\mu$ L per site at the left and right hock  
66 (100 $\mu$ L/mouse). For *in vivo* OVA treatment (pulse) experiments, mice were given OVA without  
67 adjuvants intraperitoneally at 3mg/mouse/day for 3 consecutive days.

68

#### 69 **DQ-OVA and OVA pulse assay**

70 Platelets ( $2 \times 10^7$ /mL) in Medium 199 were treated (pulsed) with DQ-OVA at 100ug/mL  
71 at 37°C for 1 hour, followed by CD41 surface staining at room temperature in the dark for 15-30  
72 min and acquired on flow cytometry immediately. For negative controls, platelets were stained  
73 for CD41, fixed with equal volume of 4% PFA, and then pulsed with DQ-OVA for 1h.  
74 Proteasome inhibitors MG-132, Bortezomib, lactacystin and corresponding vehicles were added  
75 to platelet suspension at a final concentration of 40uM for 30 min, followed by DQ-OVA pulse  
76 for 1h. CD41 staining was added during the last 30 min of DQ-OVA pulse. Samples were  
77 acquired on flow cytometer immediately. To confirm the successful inhibition of proteasome  
78 activity in platelets, the 20S Proteasome Activity Assay kit was used according to the  
79 manufacturer's recommendations (Millipore Sigma). Briefly, platelets isolated from control mice  
80 were used for the indicated treatment and prepared in the cell lysis buffer following the  
81 manufacture's manual and measured for their 20S proteasome activity. For OVA pulse, platelets  
82 ( $2 \times 10^7$ /mL) in Medium 199 were pulsed with OVA at 1mg/mL at 37°C with gentle rotation for 6  
83 hours, washed and then stained for CD41, H-2K<sup>b</sup>, and SIINFEKL:H2K<sup>b</sup> surface molecules. For  
84 SIINFEKL peptide pulse, platelets were pulsed with SIINFEKL peptide (Ovalbumin257-264  
85 (chicken)) at 25μM for 2h and washed two times.

86

### 87 **Aspartate Aminotransferase (AST) Activity Assay**

88 To biochemically evaluate the disease severity in our CLP sepsis model, AST blood  
89 levels were measured using the commercial AST Activity Assay Kit from Millipore Sigma  
90 following manufacture's protocol. Briefly, mouse blood was collected by cardiac puncture  
91 without anticoagulants. After clotting for 30 min undisturbed at room temperature, blood

92 samples were centrifuged at 2000×g 10min at 4°C. Serum was collected and centrifuged at  
93 12000×g 2 min to further remove debris and saved for the AST activity assay.

94

#### 95 **Murine CD8<sup>+</sup> T cell isolation and *in vitro* labelling**

96 Single cell suspensions of splenocytes from Rag2<sup>-/-</sup>OT-I mice were lysed with ACK red  
97 blood cell lysis buffer and then washed with PBS. CD8<sup>+</sup> T cells were isolated by negative  
98 selection using a CD8<sup>+</sup> T cell isolation kit (mouse) from Miltenyi Biotec following the  
99 manufacturer's instructions. The purity and viability of isolated CD8<sup>+</sup> T cells were measured by  
100 flow cytometry (all isolations were >95% purity and >95% viability). For proliferation assays,  
101 CD8<sup>+</sup> T cells were washed with PBS twice and then stained with Violet Proliferation Dye 450  
102 (V450) following the manufacturer's instructions.

103

#### 104 **CD8<sup>+</sup> T cell proliferation assay**

105 The isolated, V450 stained, CD8<sup>+</sup> T cells from Rag2<sup>-/-</sup>OT-I mice mentioned above were  
106 used for the proliferation assay. To induce CD8<sup>+</sup> T cell activation and proliferation in the  
107 absence of stimulation or an exogenous cytokine like IL-2, we added fixed APCs which  
108 stimulates CD8<sup>+</sup> T cell proliferation weakly.<sup>5</sup> As to the preparation of fixed APCs, we pretreated  
109 CD45.1 splenocytes with SIINFEKL at 25uM in the presence of LPS, LBP and CD14 all at  
110 100ng/mL for 6h. After stimulation, the splenocytes were fixed with 0.8% PFA for 5 min,  
111 washed and added to cell culture to provide a consistent stimulatory signal for CD8<sup>+</sup> activation.

112 Platelets from indicated conditions were used at a ratio of platelet:CD8=50:1 (comparable to  
113 physiological ratios). Fixed CD45.1 were used at equal numbers to CD8<sup>+</sup> T cells. For CD3/CD28  
114 antibody-stimulated conditions, we coated the cell culture plate with a CD3 antibody at 1µg/mL

115 overnight at 4°C, washed with PBS prior to the experiment, and then added a CD28 antibody at  
116 2µg/mL at the time of the experiment.

117

### 118 **Quantitative Real-Time PCR (qRT-PCR)**

119 Total RNA was isolated from platelets lysed in TRIZOL reagent. Quantitative real-time  
120 PCR analysis was then performed with Quanta Perfecta SYBR Supermix kit. HLA-A mRNA  
121 expression was normalized to human TUBB1. Thermal cycling conditions were as follows: 2  
122 min at 95°C, 40 cycles of 30 sec at 94°C, and 30 sec at 54°C, 45 sec at 72°C, followed by 10 min  
123 at 72°C. Primers used for HLA-A and TUBB1 are: HLA-A Forward 5'-  
124 GATTACATCGCCTTGAACGAGG-3', HLA-A reverse 5'- GCAGGGTAGA AGCTCAGGG-  
125 3'; TUBB1 forward 5'- GCGTGTACTACAACGAAGCCTAC-3', TUBB reverse 5'-  
126 AAAACTGTCTGGGTTGAAAGAGAG-3'.

127

### 128 **Flow cytometry**

129 For the MHC-I expression assay, platelets were incubated with anti-human HLA-A, B, C,  
130 anti-mouse H-2D, H-2K, or anti-mouse SIIN:H-2K<sup>b</sup> antibodies (depending on the experiment) at  
131 room temperature in the dark (20-30 min). Platelets were then fixed with an equal volume of 4%  
132 paraformaldehyde for 15 min. Samples were acquired on a flow cytometer immediately or, in  
133 some experiments, washed with platelet binding buffer after fixation and acquired on a flow  
134 cytometer within 2 hours. For CD8<sup>+</sup> T cells, dendritic cells, and monocytes, single cell  
135 suspensions of PBMCs, lymph nodes, and splenocytes, cells were Fc blocked using rat anti-  
136 mouse CD16/32 (clone2.4G2, BD 553141). Cells were then incubated with the appropriate  
137 antibody (depending on the experiment) or the viability dye at room temperature for 30 min, and



138 then fixed and washed. For the tetramer staining, cells were incubated with either isotype  
139 tetramer control or a specific tetramer at 4°C for 30 min after Fc blocking. Cells were then  
140 washed, and stained for CD45, TCRβ, CD8, followed by fixation. Please see Supplemental Table  
141 2 for antibody information. The intracellular interferon-γ (IFN- γ) staining was carried out  
142 following BD Fixation/Permeabilization Solution Kit protocol. Briefly, cells were stimulated  
143 with eBioscience Cell Stimulation Cocktail for 4-6h *in vitro*, followed by surface staining  
144 including TCRβ, CD8, CD44 and CD62L, fixation/permeabilization and intracellular staining for  
145 IFN-γ.

146

#### 147 **Western blotting**

148 Washed platelets were saved in lysis buffer, separated by gel electrophoresis,  
149 electrotransferred onto PVDF membranes, and then blocked in TBS, 0.1% Tween 20 and 5% dry  
150 milk. Western blots were probed with antibodies against B2M (Abcam), human MHC-I (Santa  
151 Cruz) or mouse MHC-I (Bio-Rad). Beta-actin (Santa Cruz) was used as a control for protein  
152 loading and densitometric quantification.

153

#### 154 **Immunofluorescence microscopy**

155 For platelet MHC-I staining, platelets ( $0.5-1 \times 10^8/\text{mL}$ ) suspended in Medium 199 were  
156 fixed with an equal volume of 4% PFA and cytopun onto a cover glass. Platelets were then  
157 washed, permeabilized with 0.1% Triton-X 100 in HBSS, blocked with 10% goat serum, and  
158 incubated with primary antibodies at 4°C overnight, followed by incubation with secondary  
159 antibodies at room temperature for 2 hours. For platelet and CD8<sup>+</sup> T cell co-culture and staining,  
160 chamber wells were pre-coated with either fibrinogen or poly-L-lysine. For fibrinogen coating,

161 chamber wells were coated with fibrinogen at 100 $\mu$ g/mL at 37°C for 30 min or overnight at 4°C  
162 and blocked with 2% serum albumin. For poly-L-lysine coating, chamber wells were coated with  
163 poly-L-lysine at 100 $\mu$ g/mL overnight at 4°C. OVA or SIINFEKL pulsed platelets were then  
164 washed and seeded onto the fibrinogen coated chamber wells at a density of 4 $\times$ 10<sup>7</sup> platelets/mL  
165 for 30-40 min. The wells were then carefully washed to remove nonadherent platelets. CD8<sup>+</sup> T  
166 cells isolated from *Rag2*<sup>-/-</sup>OT-I mice were next added to the chamber wells at a density of  
167 4 $\times$ 10<sup>6</sup>/mL CD8<sup>+</sup> T cells/well (platelet: CD8<sup>+</sup> T cell ratio=10:1). After 30 minutes of co-  
168 incubation, unbound cells were washed off. The remaining cells were fixed with 2% PFA,  
169 followed by permeabilization with 0.1% Triton, blocking with 2% serum albumin, and finally  
170 stained with primary and secondary antibodies. Alternatively, SIINFEKL pulsed platelets were  
171 seeded onto poly-L-lysine coated chamber wells. Since platelets remain quiescent on poly-L-  
172 lysin, platelets were seeded at a higher concentration of 6.6 $\times$ 10<sup>7</sup> platelets/mL for 1 hour. The  
173 nonadherent platelets were carefully removed. CD8<sup>+</sup> T cells from *Rag2*<sup>-/-</sup>OT-I mice were added  
174 at a platelet: CD8<sup>+</sup> T cell ratio of 10:1 for 1 hour. Samples were fixed with 2% PFA and then  
175 washed. Cells were allowed to settle overnight at 4°C, washed again the following day, treated  
176 with ammonium chloride 50mM for antigen retrieval (15 minutes), and continued for further  
177 permeabilization with 0.1% Triton-X 100 in HBSS, blocking with 10% goat serum, incubation  
178 with primary antibodies at 4°C overnight, and immunofluorescent secondary antibodies at room  
179 temperature for 2 hours. Antibodies used include anti-beta2 microglobulin antibody, anti-CD8a  
180 antibody, anti-integrin  $\alpha$ IIb antibody, anti-GPIIb $\beta$  derivative DyLight649, DAPI and secondary  
181 antibodies (please see Supplemental Table 2). 2D and Z-stack images were acquired using an  
182 Olympus IX81, FV300 (Olympus, Melville, NY) confocal-scanning microscope equipped with  
183 60 $\times$ /1.42 N.A. and 40 $\times$ /1.35 N.A. oil objectives. Four laser excitation wavelengths were used

184 (405, 488, 568 and 640nm). Z-stack images were used for the reconstructed 3D structure, for 3D  
185 videos, and max projection images.

186

### 187 **Statistical Analyses**

188 Statistical analyses were performed using Prism 8 software (GraphPad Software Inc.).

189 Two-tailed Student t test or ANOVA with post hoc tests were used to compare continuous  
190 variables when data were normally distributed. The Mann-Whitney test was used to compare  
191 non-normally distributed variables. Log rank (e.g., Mantel-Cox) survival test was used for  
192 survival. Two-tailed P values of  $<0.05$  were considered statistically significant.

193 **Supplemental Tables**

194

195 **Supplemental Table 1.** Demographic data from septic patients and healthy donors. SOFA score

196 refers to the Sequential Organ Failure Assessment score, and is an index of illness severity in

197 septic patients.

|                      | <b>Septic Patients</b> | <b>Healthy Donors</b> |          |
|----------------------|------------------------|-----------------------|----------|
| <b>Total</b>         | n=46                   | n=20                  |          |
| Age, years (mean±SD) | 57.6 (±14.3)           | 38.7 (±12.7)          | P<0.0001 |
| Male Sex, n (%)      | 18 (39.1%)             | 8 (40%)               | p=0.23   |
| SOFA Score           | 5.9 (±3.3)             | --                    | --       |

198

199

200 **Supplemental Table 2.** List of antibodies and reagents.

| <b>Antibodies and reagents</b>                                                 | <b>Provider</b>            | <b>Catalog No.</b> |
|--------------------------------------------------------------------------------|----------------------------|--------------------|
| <b>Antibodies</b>                                                              |                            |                    |
| Anti-CD41 antibody                                                             | Abcam                      | ab11024            |
| Anti-MHC class I antibody [ER-HR 52]                                           | Abcam                      | ab15681            |
| Mouse IgG2a, kappa monoclonal                                                  | Abcam                      | ab18415            |
| Rat IgG2a, kappa monoclonal [RTK2758]                                          | Abcam                      | ab18450            |
| Anti-HLA Class I antibody [W6/32]                                              | Abcam                      | ab23755            |
| Mouse IgG1 monoclonal                                                          | Abcam                      | ab81032            |
| Anti-beta 2 microglobulin antibody                                             | Abcam                      | Ab75853            |
| PE-Cy7 Mouse IgG2a, $\kappa$ Isotype Control                                   | BD Biosciences             | 552868             |
| Purified Rat Anti-Mouse CD16/CD32                                              | BD Biosciences             | 553142             |
| FITC Mouse Anti-Human CD41a                                                    | BD Biosciences             | 555466             |
| PE Mouse Anti-Human CD41a                                                      | BD Biosciences             | 555467             |
| PE-Cy <sup>TM</sup> 7 Mouse Anti-Mouse CD45.2                                  | BD Biosciences             | 560696             |
| Human BD Fc Block                                                              | BD Biosciences             | 564220             |
| Pacific Blue <sup>TM</sup> anti-mouse H-2Kb antibody                           | Biolegend                  | 116514             |
| PerCP/Cyanine5.5 anti-mouse H-2Kb antibody                                     | Biolegend                  | 116516             |
| Alexa Fluor 488 anti-mouse CD11c Antibody                                      | Biolegend                  | 117311             |
| APC anti-mouse H-2Kb bound to SIINFEKL antibody                                | Biolegend                  | 141606             |
| Alexa Fluor® 488 anti-human CD41 Antibody                                      | Biolegend                  | 303724             |
| APC anti-human HLA-A,B,C Antibody                                              | Biolegend                  | 31110              |
| APC Mouse IgG1, $\kappa$ Isotype Ctrl Antibody                                 | Biolegend                  | 400119             |
| Alexa Fluor® 488 Mouse IgG1, $\kappa$ Isotype Ctrl Antibody                    | Biolegend                  | 400132             |
| Pacific Blue <sup>TM</sup> Mouse IgG2a, $\kappa$ Isotype Ctrl Antibody         | Biolegend                  | 400235             |
| PerCP/Cyanine5.5 Mouse IgG2a, $\kappa$ Isotype Ctrl Antibody                   | Biolegend                  | 400257             |
| Alexa Fluor® 488 Armenian Hamster IgG Isotype Ctrl Antibody                    | Biolegend                  | 400923             |
| MHC Class I antibody 2G5                                                       | Bio-Rad                    | MCA2189            |
| H-2D(b) LCMV GP var C41M 33-41 KAVYNFATM Brilliant Violet 421-Labeled Tetramer | NIH Tetramer Core Facility | NA                 |

|                                                                            |                            |            |
|----------------------------------------------------------------------------|----------------------------|------------|
| H-2K(b) chicken ova 257-264 SIINFEKL Brilliant Violet 421-Labeled Tetramer | NIH Tetramer Core Facility | NA         |
| Integrin beta 3/CD61 Antibody (BV4)                                        | NOVUS                      | NB600-1342 |
| Integrin $\alpha$ IIb Antibody (H-160)                                     | Santa Cruz                 | sc-15328   |
| MHC class I Antibody (W6/32)                                               | Santa Cruz                 | sc-32235   |
| $\beta$ -Actin Antibody (C4)                                               | Santa Cruz                 | sc-47778   |
| CD41a Monoclonal Antibody, PE-Cyanine7                                     | ThermoFisher               | 25-0411-82 |
| CD41a Monoclonal Antibody, FITC                                            | ThermoFisher               | 11-0411-82 |
| CD44 Monoclonal Antibody, FITC                                             | ThermoFisher               | 11-0441-85 |
| CD45.2 Monoclonal Antibody, FITC                                           | ThermoFisher               | 11-0454-85 |
| Rat IgG1 kappa Isotype Control, FITC                                       | ThermoFisher               | 11-4301-81 |
| Mouse IgG2a kappa Isotype Control, FITC                                    | ThermoFisher               | 11-4724-81 |
| CD8a Monoclonal Antibody, PE                                               | ThermoFisher               | 12-0081-83 |
| Rat IgG2a kappa Isotype Control, PE                                        | ThermoFisher               | 12-4321-80 |
| CD8a Monoclonal Antibody                                                   | ThermoFisher               | 14-0081-82 |
| CD3e Monoclonal Antibody (145-2C11), APC                                   | ThermoFisher               | 17-0031-83 |
| CD19 Monoclonal Antibody, APC                                              | ThermoFisher               | 17-0193-82 |
| Rat IgG2a kappa Isotype Control, APC                                       | ThermoFisher               | 17-4321-81 |
| Armenian Hamster IgG Isotype Control                                       | ThermoFisher               | 17-4888-81 |
| MHC Class I (H-2Db) Monoclonal Antibody (28-14-8), APC,                    | ThermoFisher               | 17-5999-82 |
| CD4 Monoclonal Antibody, PE-Cyanine7,                                      | ThermoFisher               | 25-0041-82 |
| CD11c Monoclonal Antibody, PE-Cyanine7                                     | ThermoFisher               | 25-0114-82 |
| Armenian Hamster IgG Isotype Control, PE-Cyanine7                          | ThermoFisher               | 25-4888-81 |
| Armenian Hamster IgG Isotype Control, PerCP-Cyanine5.5                     | ThermoFisher               | 45-4888-80 |
| TCR beta Monoclonal Antibody, PerCP-Cyanine5.5                             | ThermoFisher               | 45-5961-82 |
| CD62L (L-Selectin) Monoclonal Antibody, APC-eFluor 780                     | ThermoFisher               | 47-0621-82 |
| Rat IgG2a kappa Isotype Control, APC-eFluor 780                            | ThermoFisher               | 47-4321-80 |
| CD4 Monoclonal Antibody (GK1.5), eFluor 450                                | ThermoFisher               | 48-0041-82 |
| CD41a Monoclonal Antibody, eFluor 450                                      | ThermoFisher               | 48-0411-82 |
| IFN gamma Monoclonal Antibody                                              | ThermoFisher               | 50-7311-82 |
| Rat IgG2b kappa Isotype Control, eFluor 450                                | ThermoFisher               | 48-4031-80 |

|                                                                                      |                 |                           |
|--------------------------------------------------------------------------------------|-----------------|---------------------------|
| Rat IgG1 kappa Isotype Control, eFluor 660                                           | ThermoFisher    | 50-4301-80                |
| Rat IgG1 kappa Isotype Control, eFluor 450,                                          | ThermoFisher    | 48-4301-80                |
| Goat anti-Mouse IgG (H+L) Highly Cross-Adsorbed Secondary Antibody, Alexa Fluor 488  | ThermoFisher    | A-11029                   |
| Goat anti-Mouse IgG (H+L) Highly Cross-Adsorbed Secondary Antibody, Alexa Fluor 546  | ThermoFisher    | A-11030                   |
| Goat anti-Rat IgG (H+L) Cross-Adsorbed Secondary Antibody, Alexa Fluor 546           | ThermoFisher    | A-11081                   |
| Donkey anti-Rat IgG (H+L) Highly Cross-Adsorbed Secondary Antibody, Alexa Fluor 488  | ThermoFisher    | A-21208                   |
| Goat anti-Rabbit IgG (H+L) Highly Cross-Adsorbed Secondary Antibody, Alexa Fluor 647 | ThermoFisher    | A-21245                   |
| Goat anti-Rat IgG (H+L) Cross-Adsorbed Secondary Antibody, Alexa Fluor 647           | ThermoFisher    | A-21247                   |
| DAPI                                                                                 | ThermoFisher    | D1306                     |
| Wheat Germ Agglutinin, Alexa Fluor™ 555 Conjugate                                    | ThermoFisher    | w32464                    |
| CD3 Monoclonal Antibody (17A2), Functional Grade                                     | ThermoFisher    | 16-0032-85                |
| CD28 Monoclonal Antibody (CD28.2), Functional Grade                                  | ThermoFisher    | 16-0289-85                |
| Anti-platelet antibody                                                               | Emfret          | R300                      |
| Negative control for #R300                                                           | Emfret          | C301                      |
| Anti-GPIIb/IIIa derivative                                                           | Emfret          | X649                      |
| <b>Chemicals, Peptides, Proteins and Glycolipids</b>                                 |                 |                           |
| albumin human solution                                                               | Baxalta US Inc  | NDC code.<br>0944-0492-02 |
| Adjuvant, Complete ( <i>Freund</i> )                                                 | BD              | 263810                    |
| Adjuvant, Incomplete ( <i>Freund</i> )                                               | BD              | 263910                    |
| Recombinant Human TPO                                                                | PeptoTech       | 300-18                    |
| Fibrinogen, Human Plasma                                                             | Millipore Sigma | 341576                    |
| Albumin from chicken egg white                                                       | Millipore Sigma | A5503                     |
| Lipopolysaccharides from <i>Escherichia coli</i> O55:B5                              | Millipore Sigma | L6529-1MG                 |
| Bortezomib                                                                           | Millipore Sigma | 5.04314                   |
| MG-132                                                                               | Millipore Sigma | M7449-200UL               |
| Lactacystin                                                                          | Millipore Sigma | L6785-.2MG                |

|                                              |                  |             |
|----------------------------------------------|------------------|-------------|
| Human CD14 Recombinant Protein               | FisherScientific | 383CD050    |
| Human LBP Recombinant Protein                | FisherScientific | 870LP025    |
| Human IFN gamma Recombinant Protein          | ThermoFisher     | RP-8607     |
| SCF (C-Kit Ligand) Recombinant Human Protein | ThermoFisher     | PHC2116     |
| DQ Ovalbumin (DQ-OVA)                        | ThermoFisher     | D12053      |
| eBioscience Cell Stimulation Cocktail        | ThermoFisher     | 00-4975-93  |
| <b>Commercial Assays</b>                     |                  |             |
|                                              |                  |             |
| CD8a+ T Cell Isolation Kit, mouse            | Miltenyi Biotec  | 130-104-075 |
| Fixation/Permeabilization Solution Kit       | BD               | 554714      |
| AST Activity Assay Kit                       | Millipore Sigma  | MAK055      |
| 20S Proteasome Activity Assay                | Millipore Sigma  | APT280      |

201  
202



203 **Supplemental Figures**

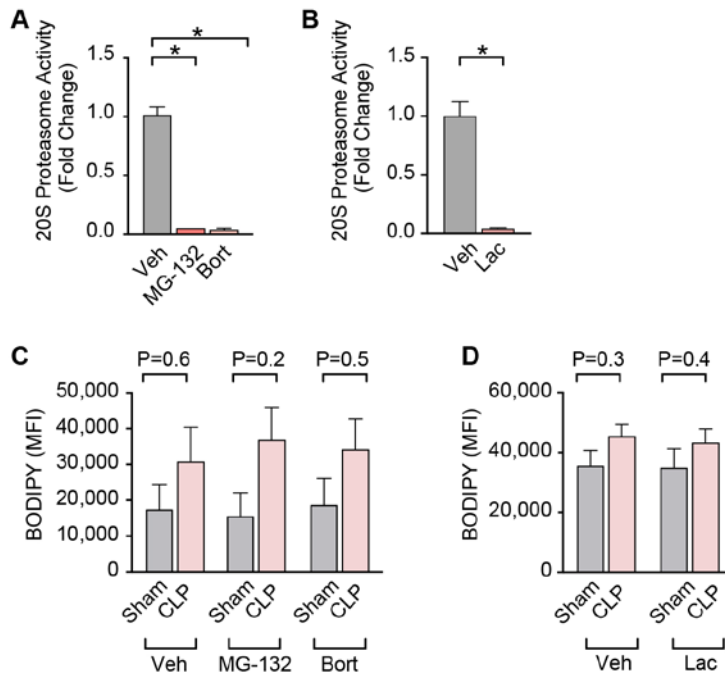

204

205 **Supplemental Figure 1. Proteasome independent processing of DQ-OVA by platelets.**

206 Unstimulated, washed platelets isolated from wild-type mice were treated with three different  
 207 proteasome inhibitors: MG-132, bortezomib (Bort), or lactacystin (Lac) at 40 $\mu$ M final, or with  
 208 corresponding vehicle control (Veh) for 30 min at 37 $^{\circ}$ C. **(A-B)** All three inhibitors blocked platelet  
 209 20S proteasome activity under basal conditions (i.e., non-septic conditions). **(C-D)** Wild-type mice  
 210 were subject to either CLP sepsis or sham control, as described in the methods. Washed platelets  
 211 isolated from either sham or CLP mice on day 4 were pre-treated with one of the three proteasome  
 212 inhibitors (MG-132, Bort, or Lac) for 30 min at 37 $^{\circ}$ C, then pulsed with DQ-OVA at 100 $\mu$ g/mL  
 213 for 60 min and then stained for CD41. BODIPY signal was measured in platelets immediately  
 214 (MFI: mean fluorescence intensity). One-way ANOVA with Sidak's post hoc test and paired t-test  
 215 were used. (n=3-13, \*P<0.05).

216

217

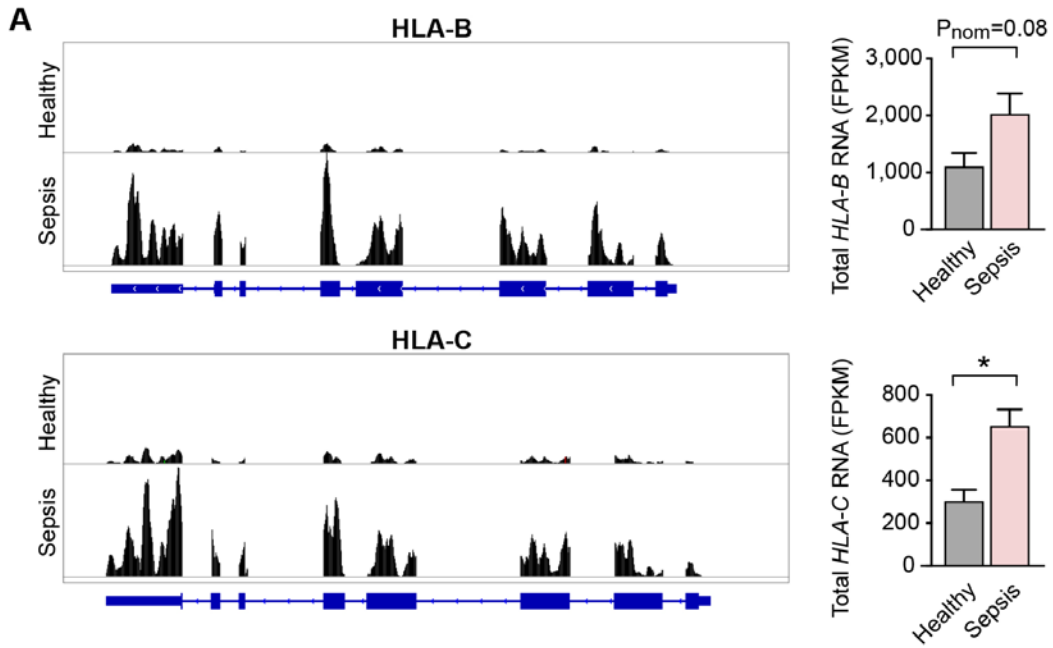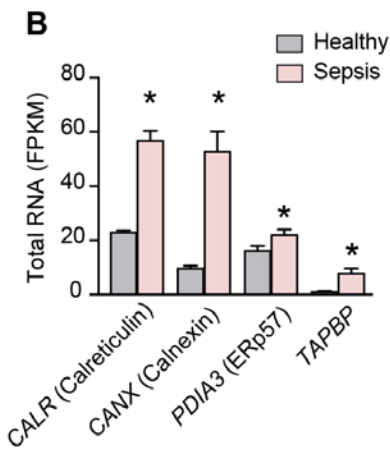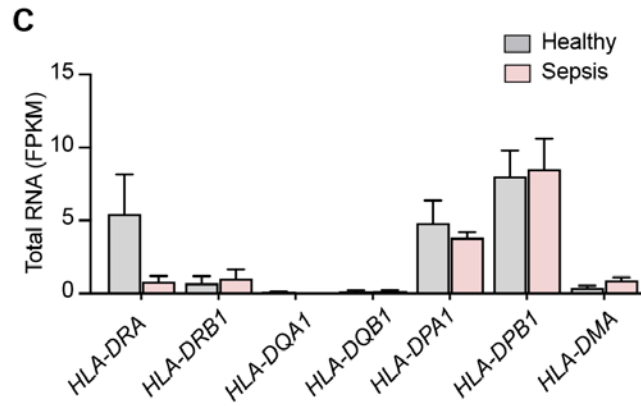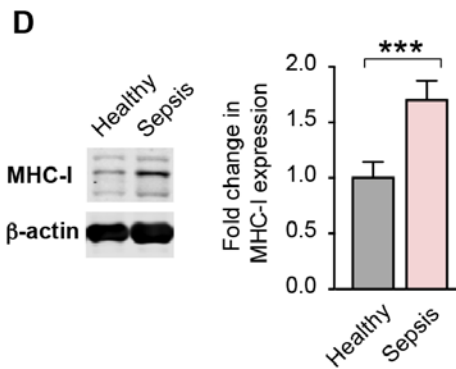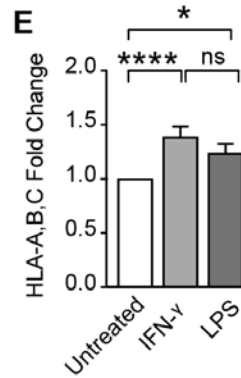

220 **Supplemental Figure 2. MHC-I pathway genes are selectively upregulated in human**  
221 **platelets during sepsis. (A, left)** Representative IGV browser images illustrating the RNA  
222 expression of MHC-I alleles HLA-B and HLA-C in platelets from a healthy donor and a septic  
223 patient. **(A, right)** Bar graphs with average RNA expression of MHC-I alleles HLA-B and -C in  
224 platelets from healthy donors and septic patients. **(B)** Genes involved in the MHC-I pathway in  
225 platelets from healthy donors and septic patients. **(C)** The RNA expression of genes involved in  
226 the MHC-II pathway in platelets from healthy donors and septic patients. **(D)** MHC-I protein in  
227 human platelets from healthy controls or septic patients was quantified by western blotting, with  
228 representative gels on the left. **(E)** Day 13 CD34<sup>+</sup> derived megakaryocytes were either untreated,  
229 or treated with IFN- $\gamma$  250U/mL or LPS 100ng/mL for 20h. The cell surface expression of MHC-I  
230 (HLA-A,B,C) on megakaryocytes was measured by flow cytometry. The fold increase of MHC-I  
231 MFI was calculated and normalized to untreated conditions. (Patient samples were collected on  
232 day 0 for all experiments above, unpaired t test and one-way ANOVA with Sidak's post hoc test,  
233 n=4-5, \*P<0.05, \*\*\*P<0.001, \*\*\*\*P<0.0001, ns: not significant).

234

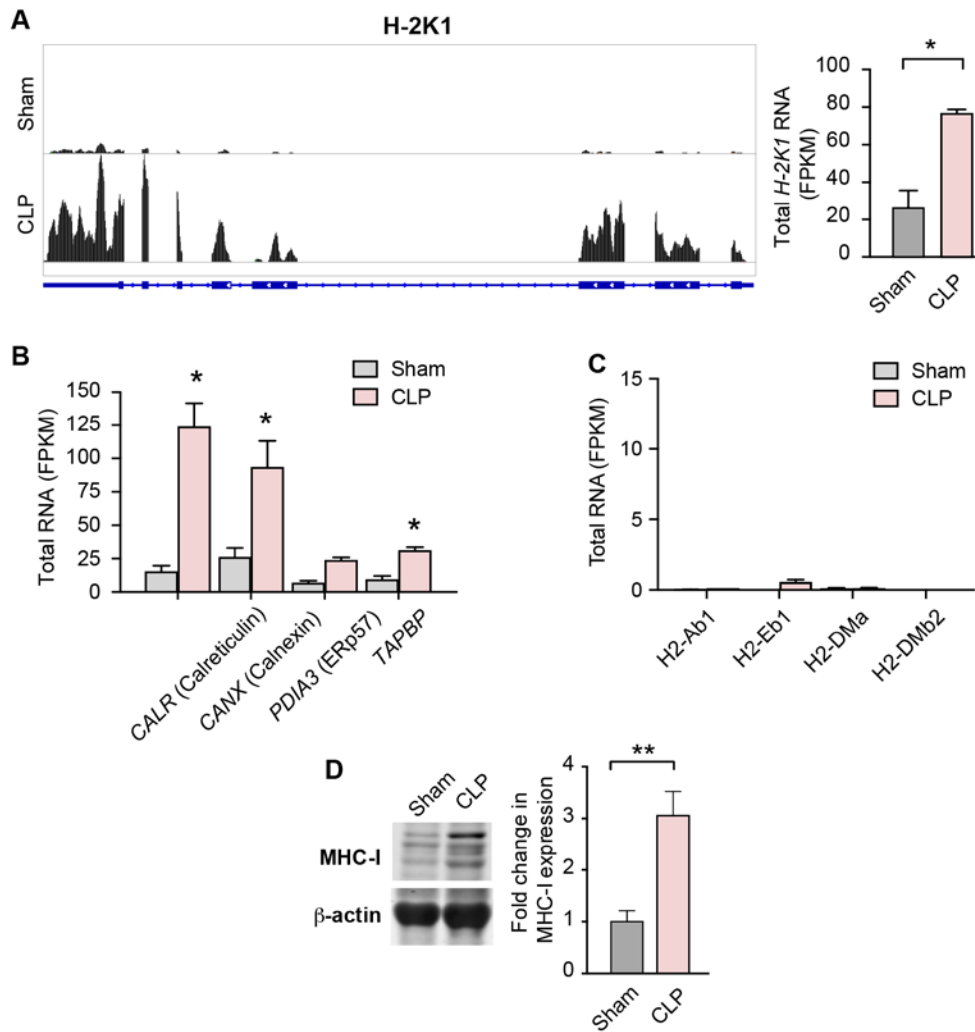

235  
236

237 **Supplemental Figure 3. MHC-I pathway genes are selectively upregulated in murine**  
 238 **platelets during sepsis. (A, left)** Representative IGV browser images illustrating the RNA  
 239 expression of MHC-I allele H2-K1 in platelets from a sham treated and CLP septic mouse. **(A,**  
 240 **right)** Bar graphs with average RNA expression of MHC-I allele H-2K in platelets from sham-  
 241 treated and CLP septic mice (n=3-4). **(B)** Genes involved in the MHC-I pathway in platelets  
 242 from sham treated and CLP septic mice (n=3-4). **(C)** The RNA expression of genes involved in  
 243 the MHC-II pathway in platelets from sham treated and CLP septic mice. **(D)** MHC-I protein in

244 platelets from sham control mice or CLP septic mice was quantified by western blotting, with  
245 representative gels on the left (n=3, unpaired t test, \*P<0.05).

246

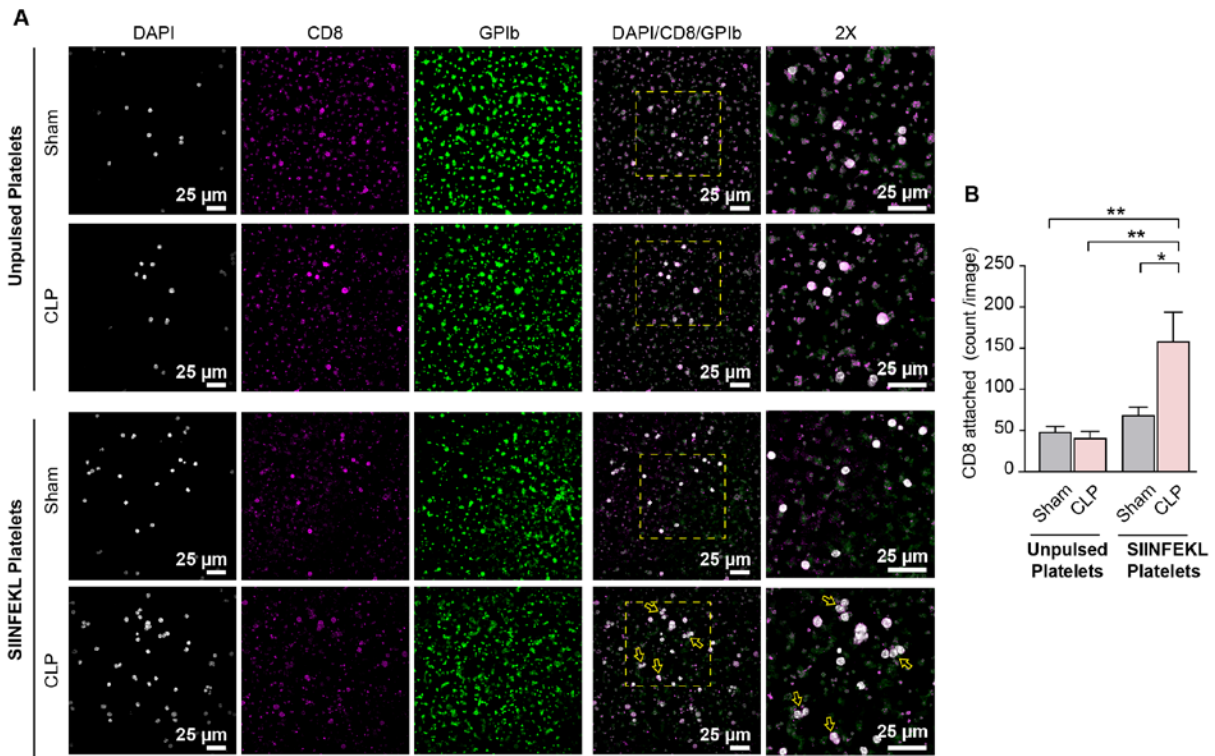

247  
 248  
 249  
 250  
 251  
 252  
 253  
 254  
 255  
 256  
 257  
 258  
 259

**Supplemental Figure 4. During sepsis, exogenous antigen presented by platelet MHC-I mediates increased CD8<sup>+</sup> T cell binding.** (A) Washed platelets isolated from either sham or CLP septic mice were seeded onto poly-L-lysine coated chamber wells, and co-cultured with SIIN:H-2K<sup>b</sup> specific CD8<sup>+</sup> T cells from Rag2<sup>-/-</sup>OT-I mice (t=1h). Unbound cells were then washed off. Attached CD8<sup>+</sup> T cells were fixed and stained for confocal immunofluorescent imaging. Representative max projection images taken at 60X are shown (yellow arrows illustrate CD8<sup>+</sup> T cells that are in close contact with platelets). (B) The number of CD8<sup>+</sup> T cells attached to poly-L-lysine were quantified (n=4, images at 40X, one-way ANOVA with Dunnett's post hoc test; \*P<0.05, \*\*P<0.01).

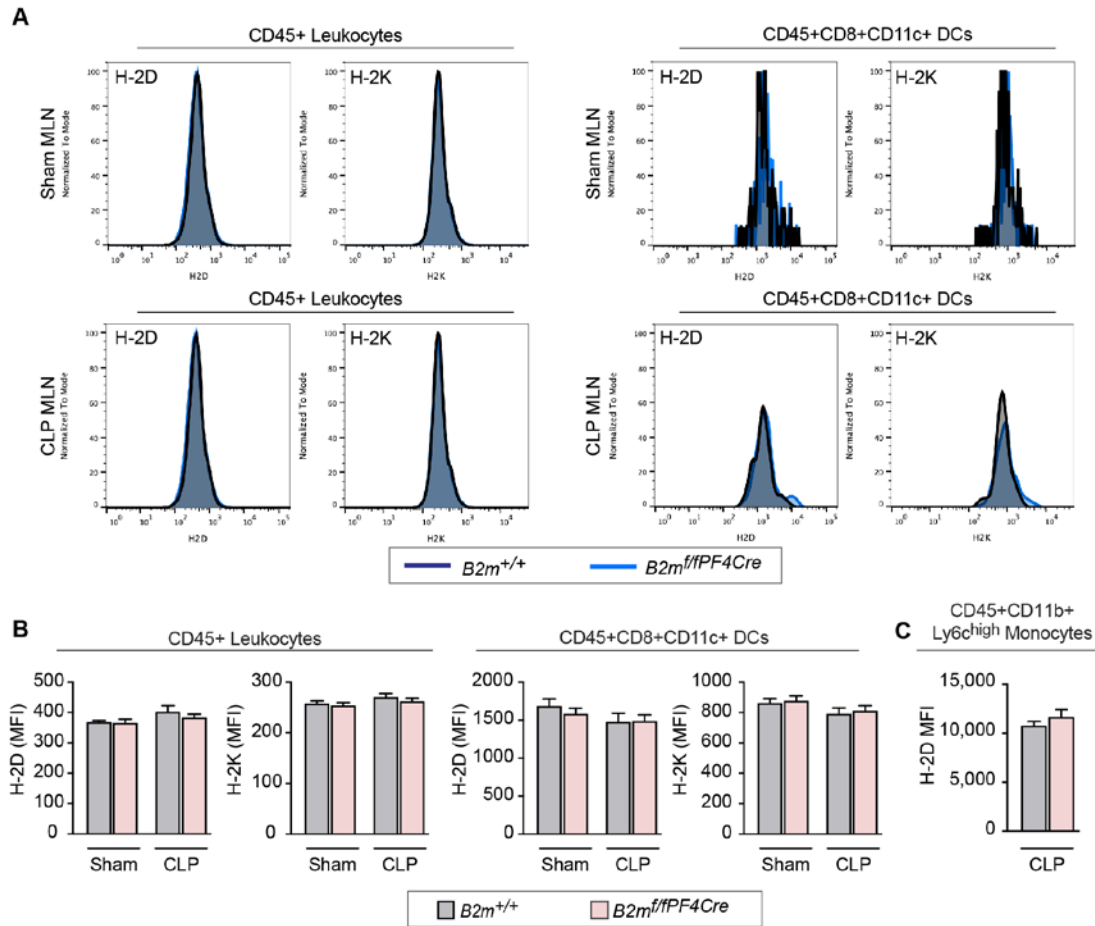

260  
261

262 **Supplemental Figure 5. MHC-I expression on total leukocytes, dendritic cells and**  
 263 **monocytes is not altered in platelet lineage specific B2m deficient mice. (A)** Representative  
 264 flow plots showing the expression of MHC-I alleles H-2D and H-2K on CD45<sup>+</sup> leukocytes and  
 265 CD45<sup>+</sup>CD8<sup>+</sup>CD11c<sup>+</sup> dendritic cells from B2m<sup>+/+</sup> and B2m<sup>f/f</sup>-Pf4Cre mice subject to sham  
 266 surgery or CLP sepsis. **(B)** The mean fluorescence intensity (MFI) of MHC-I alleles H-2D and  
 267 H-2K on CD45<sup>+</sup> leukocytes and dendritic cells from B2m<sup>+/+</sup> and B2m<sup>f/f</sup>-Pf4Cre mice subject to  
 268 sham surgery or CLP sepsis. Panels A and B from n=4-5 mice/group. **(C)** The MFI of H-2K on  
 269 CD45<sup>+</sup>CD11b<sup>+</sup>Ly6c<sup>high</sup> monocytes from B2m<sup>+/+</sup> and B2m<sup>f/f</sup>-Pf4Cre mice subject to CLP, n=3  
 270 mice/group. One-way ANOVA with Sidak's post hoc test.

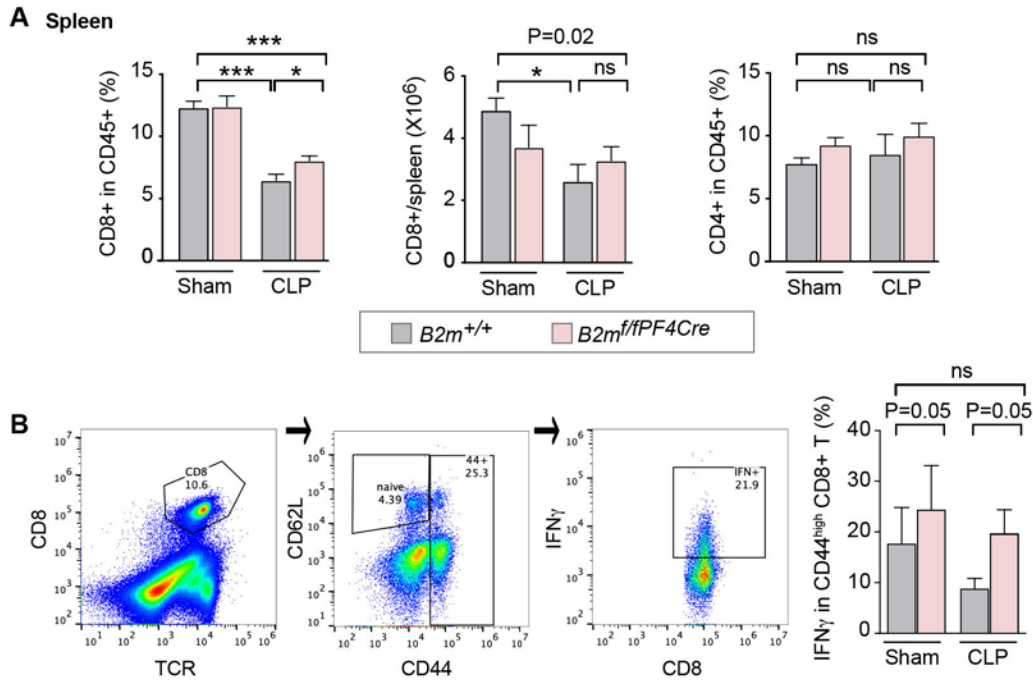

271

272 **Supplemental Figure 6. Splenic CD8<sup>+</sup> T cells are higher in B2m<sup>f/f</sup>-Pf4Cre mice during**

273 **sepsis. (A)** CD8<sup>+</sup> T cell frequency (far left) and absolute number (middle) were higher in B2m<sup>f/f</sup>-

274 Pf4Cre mice during sepsis. In contrast, CD4<sup>+</sup> T cells were not affected (far right). **(B)**

275 Representative flow plots showing the gating strategy for intracellular IFN-γ staining in the

276 CD44<sup>high</sup>CD8<sup>+</sup> population and quantification of intracellular IFN-γ expression in the splenic

277 CD44<sup>high</sup>CD8<sup>+</sup> T cells. (n=11-14, One-way ANOVA with Sidak's post hoc test. \*P<0.05,

278 \*\*\*P<0.001, ns: not significant; upper significance bars in panels A and B show the p-value for

279 the comparison between sham control condition in B2m<sup>+/+</sup> mice and CLP condition in B2m<sup>f/f</sup>-

280 Pf4Cre mice).

281



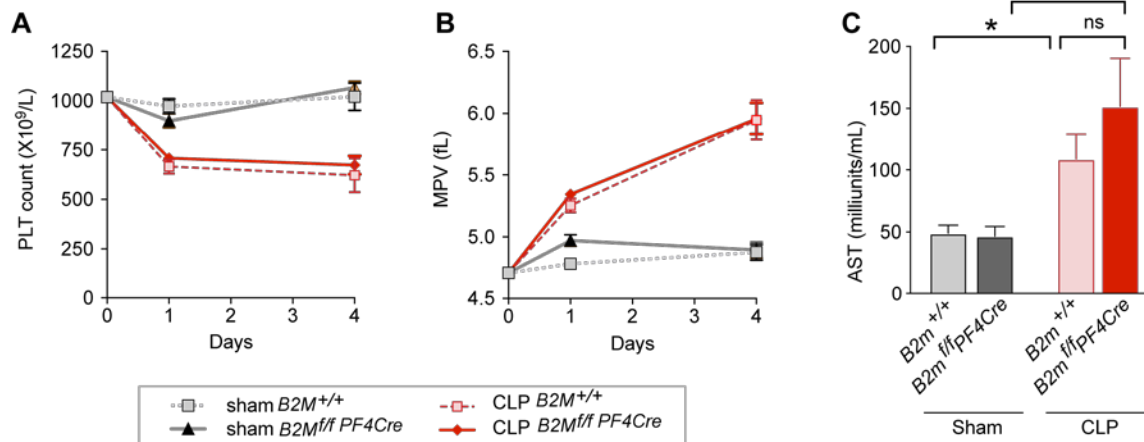

282

283

284 **Supplemental Figure 7. Evaluation of thrombocytopenia and liver injury in platelet specific**

285 **MHC-I deficient mice. (A-B)** Circulating platelet number and size are not affected by *B2m*

286 deficiency. Platelet count (A) and mean platelet volume (MPV, panel B) showed comparable

287 levels of thrombocytopenia in both *B2m*<sup>+/+</sup> and *B2m*<sup>f/f</sup>-*Pf4Cre* mice after CLP (n=12-19

288 mice/group). (C) Sepsis induced significantly increased aspartate aminotransferase (AST) in

289 both *B2m*<sup>+/+</sup> and *B2m*<sup>f/f</sup>-*Pf4Cre* mice. AST is a marker of liver injury, in this case induced by

290 sepsis. AST levels were quantified in the serum collected on day 4 after CLP (n=6-11, One-way

291 ANOVA with Sidak's post hoc test, \**P*<0.05, \*\**P*<0.01).

292

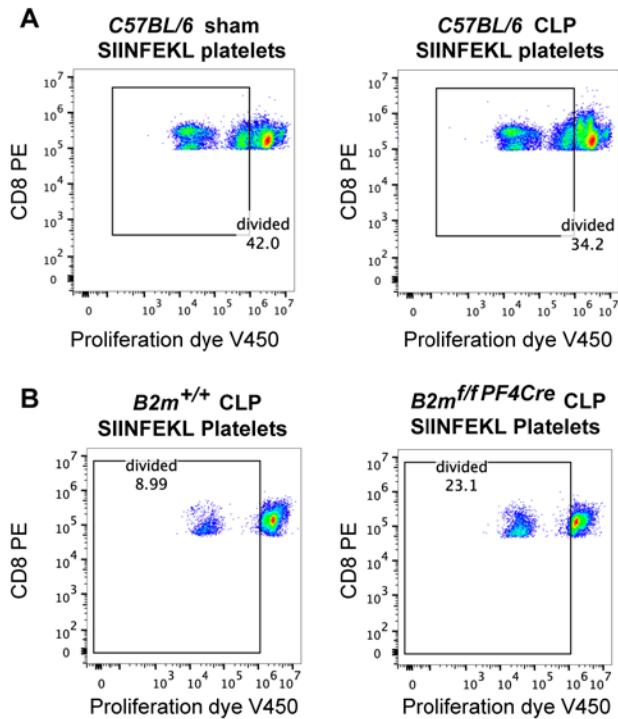

293  
294

295 **Supplemental Figure 8. Platelets from septic mice reduce antigen specific CD8<sup>+</sup> T cell**  
 296 **activation and proliferation *in vitro* in the presence of CD3/CD28 antibodies. (A-B) To**  
 297 evaluate the effect of platelet MHC-I on CD8<sup>+</sup> T cell proliferation in the presence of exogenous  
 298 stimulatory signal, CD3/CD28 antibodies were added to Rag2<sup>-/-</sup> OT-I CD8<sup>+</sup> T cells in addition to  
 299 fixed SIINFEKL pulsed CD45.1 cells. Platelets isolated either from C57BL/6J sham or CLP  
 300 mice, or from B2m<sup>+/+</sup> CLP and B2m<sup>fl</sup>-Pf4Cre CLP mice on day 4 after CLP sepsis were added  
 301 to the co-culture. CD8<sup>+</sup> T cell proliferation was measured by V450 dye after 60h. Data shown are  
 302 from an n=1 experiment using n=3-5 pooled mice for each condition.

303

304  
305  
306  
307  
308  
309  
310  
311  
312  
313  
314  
315  
316  
317  
318  
319  
320  
321  
322  
323  
324  
325  
326  
327  
328

**Supplemental Video legends**

**Supplemental Video 1. Rag2<sup>-/-</sup> OT-I CD8<sup>+</sup> T cells do not bind to unpulsed platelets isolated from WT sham mice.** In this 3D video, CD8<sup>+</sup> T cells are labelled with DAPI (blue) and CD8 (magenta). Platelets are labelled with GPIb (Green) (4 Mb, mwv file).

**Supplemental Video 2. Rag2<sup>-/-</sup> OT-I CD8<sup>+</sup> T cells do not bind to unpulsed platelets isolated from WT CLP mice.** In this 3D video, CD8<sup>+</sup> T cells are labelled with DAPI (blue) and CD8 (magenta). Platelets are labelled with GPIb (Green) (4 Mb, mwv file).

**Supplemental Video 3. Rag2<sup>-/-</sup> OT-I CD8<sup>+</sup> T cells bind to SIINFEKL pulsed platelets isolated from WT sham mice.** In this 3D video, CD8<sup>+</sup> T cells are labelled with DAPI (blue) and CD8 (magenta). Platelets are labelled with GPIb (Green) (5 Mb, mwv file).

**Supplemental Video 3. Rag2<sup>-/-</sup> OT-I CD8<sup>+</sup> T cells bind to SIINFEKL pulsed platelets isolated from WT CLP mice.** In this 3D video, CD8<sup>+</sup> T cells are labelled with DAPI (blue) and CD8 (magenta). Platelets are labelled with GPIb (Green) (5 Mb, mwv file).

329 **References**

- 330 1. Singer M, Deutschman CS, Seymour CW, et al. The Third International Consensus  
331 Definitions for Sepsis and Septic Shock (Sepsis-3). *JAMA*. 2016;315(8):801-810.
- 332 2. Hilt ZT, Pariser DN, Ture SK, et al. Platelet-derived  $\beta$ 2M regulates monocyte  
333 inflammatory responses. *JCI Insight*. 2019;4(5).
- 334 3. Manne BK, Bhatlekar S, Middleton EA, Weyrich AS, Borst O, Rondina MT. Phospho-  
335 inositide-dependent kinase 1 regulates signal dependent translation in megakaryocytes and  
336 platelets. *J Thromb Haemost*. 2020;18(5):1183-1196.
- 337 4. Bhatlekar S, Basak I, Edelstein LC, et al. Anti-apoptotic. *Haematologica*.  
338 2019;104(10):2075-2083.
- 339 5. Moreno J, Lipsky PE. Differential ability of fixed antigen-presenting cells to stimulate  
340 nominal antigen-reactive and alloreactive T4 lymphocytes. *J Immunol*. 1986;136(10):3579-3587.  
341
